# Supplementary material
Source: Springer Nature journal article supplement (https://www.springermedizin.de/resource/supplementary/12882_2014_862_MOESM1_ESM.pdf/9454474)
Supplement: MOESM1 [file 9454474]

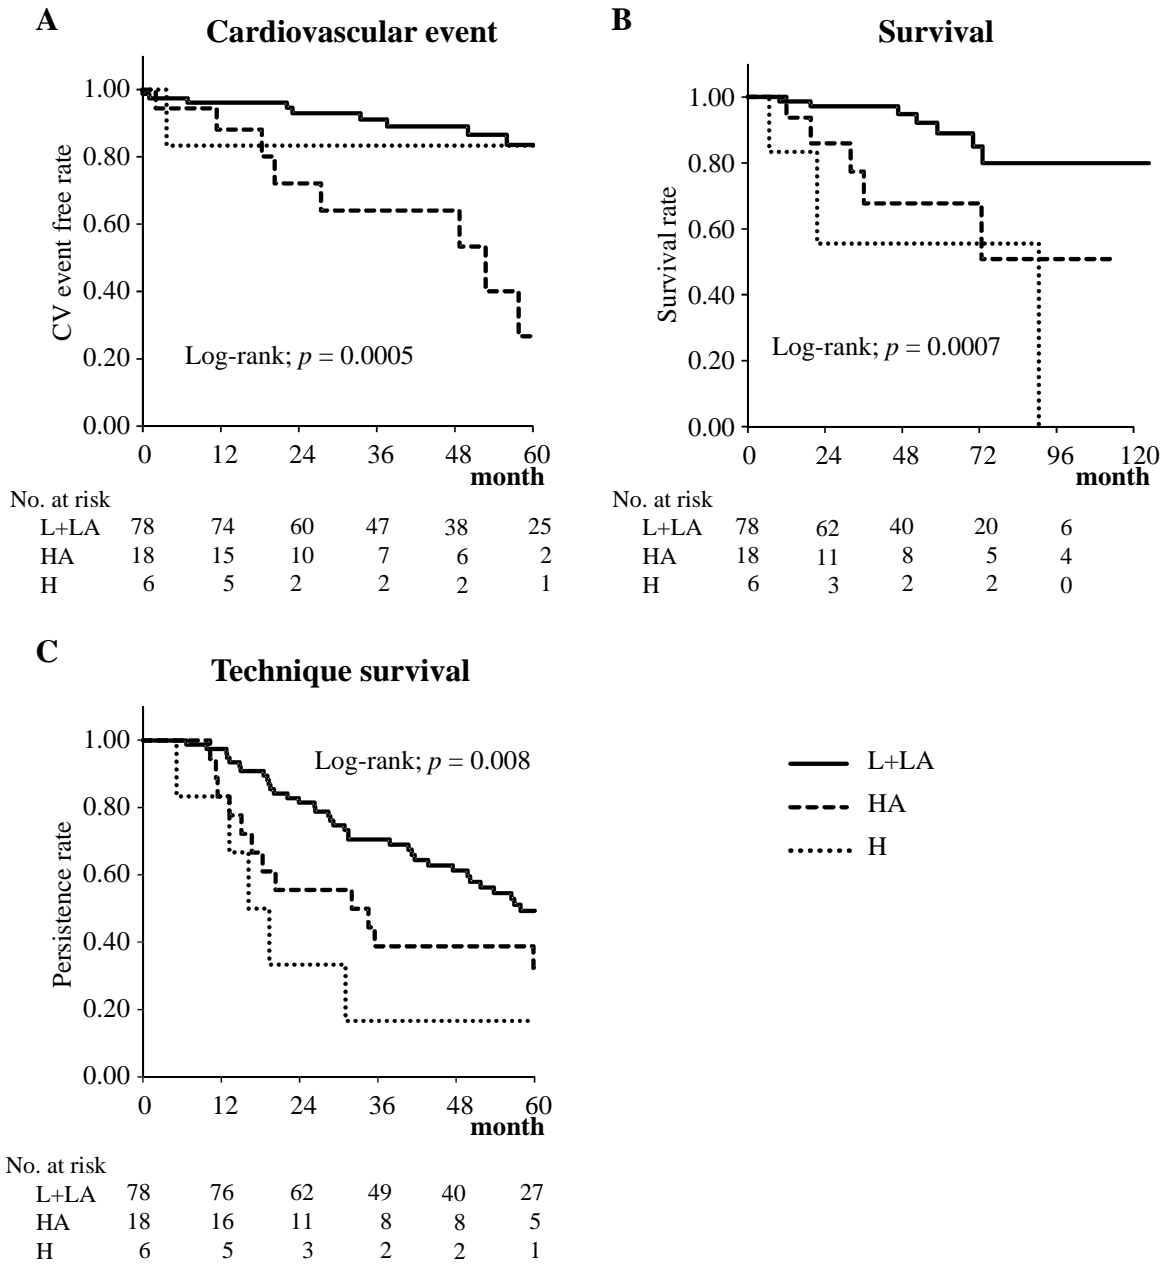

Figure S1

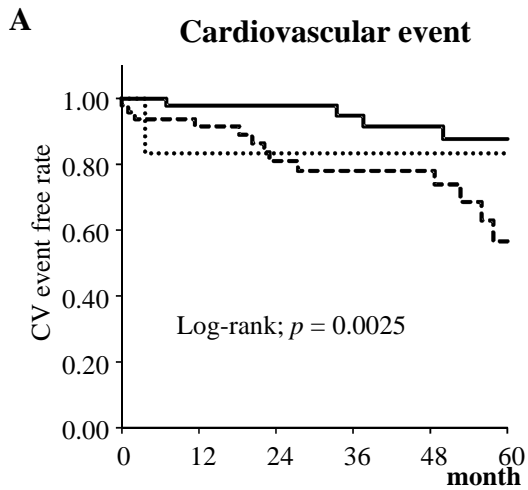

| No. at risk | 0  | 12 | 24 | 36 | 48 | 60 |
|-------------|----|----|----|----|----|----|
| Slow        | 48 | 46 | 40 | 31 | 25 | 18 |
| Average     | 48 | 43 | 30 | 23 | 20 | 9  |
| Fast        | 6  | 5  | 2  | 2  | 2  | 1  |

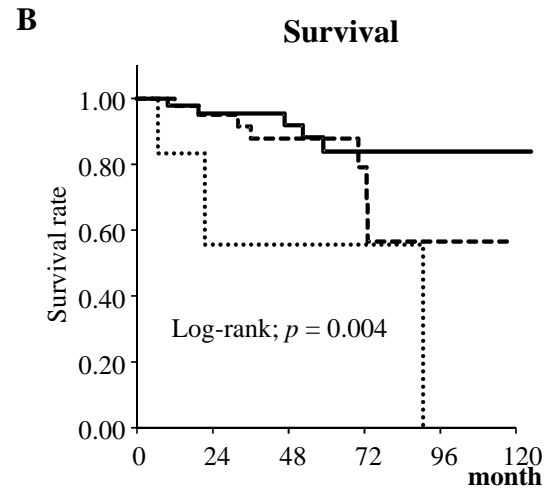

| No. at risk | 0  | 24 | 48 | 72 | 96 | 120 |
|-------------|----|----|----|----|----|-----|
| Slow        | 48 | 40 | 26 | 16 | 4  |     |
| Average     | 48 | 33 | 22 | 9  | 6  |     |
| Fast        | 6  | 3  | 2  | 2  | 0  |     |

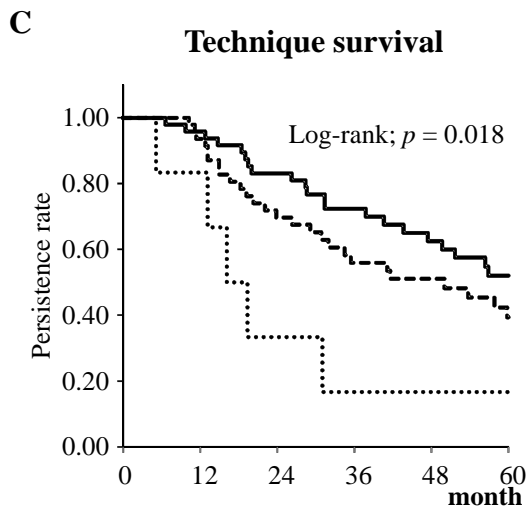

| No. at risk | 0  | 12 | 24 | 36 | 48 | 60 |
|-------------|----|----|----|----|----|----|
| Slow        | 48 | 47 | 40 | 32 | 26 | 19 |
| Average     | 48 | 45 | 33 | 25 | 22 | 13 |
| Fast        | 6  | 5  | 3  | 2  | 2  | 1  |

— Slow  
 - - - Average  
 ..... Fast

Figure S2
